# Supplementary material for: Study on the Biomolecular Competitive Mechanism of Polybrominated Diphenyl Ethers and Their Derivatives on Thyroid Hormones
Source: MDPI journal article supplement (doi:10.3390/molecules28217374), 2023-10-31
Supplement: s1 [file s1]

Table S1: Formulas of T4 and 25 kinds of OH-PBDEs

| Serial number | Compounds      | Numbers of Br | Formula                                                                             | Serial number | Compounds     | Numbers of Br | Formula                                                                               |
|---------------|----------------|---------------|-------------------------------------------------------------------------------------|---------------|---------------|---------------|---------------------------------------------------------------------------------------|
| 1             | T <sub>4</sub> | 0             | 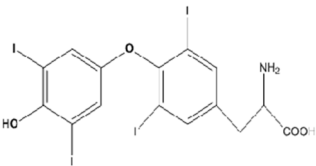   | 14            | 4'-OH-BDE-101 | 5             |    |
|               |                |               | T <sub>4</sub>                                                                      |               |               |               | 4'-OH-BDE-101                                                                         |
| 2             | 3'-OH-BDE-7    | 2             |    | 15            | 5'-OH-BDE-99  | 5             |    |
|               |                |               | 3'-OH-BDE-7                                                                         |               |               |               | 5'-OH-BDE-99                                                                          |
| 3             | 4'-OH-BDE-17   | 3             |    | 16            | 6'-OH-BDE-99  | 5             |   |
|               |                |               | 4'-OH-BDE-17                                                                        |               |               |               | 6'-OH-BDE-99                                                                          |
| 4             | 3'-OH-BDE-28   | 3             |  | 17            | 6-OH-BDE-137  | 6             |  |
|               |                |               | 3'-OH-BDE-28                                                                        |               |               |               | 6-OH-BDE-137                                                                          |

| Serial number | Compounds    | Numbers of Br | Formula                                                                                             | Serial number | Compounds     | Numbers of Br | Formula                                                                                               |
|---------------|--------------|---------------|-----------------------------------------------------------------------------------------------------|---------------|---------------|---------------|-------------------------------------------------------------------------------------------------------|
| 5             | 2'-OH-BDE-28 | 3             | 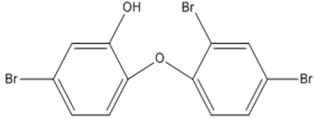<br>2'-OH-BDE-28   | 18            | 3'-OH-BDE-154 | 6             | <br>3'-OH-BDE-154  |
| 6             | 4-OH-BDE-42  | 4             | <br>4-OH-BDE-42    | 19            | 6-OH-BDE-157  | 6             | <br>6-OH-BDE-157   |
| 7             | 3-OH-BDE-47  | 4             | <br>3-OH-BDE-47    | 20            | 4-OH-BDE-188  | 6             | <br>4-OH-BDE-188   |
| 8             | 4'-OH-BDE-49 | 4             | <br>4'-OH-BDE-49 | 21            | 6-OH-BDE-180  | 7             | <br>6-OH-BDE-180 |

| Serial number | Compounds    | Numbers of Br | Formula                                                                                            | Serial number | Compounds     | Numbers of Br | Formula                                                                                                |
|---------------|--------------|---------------|----------------------------------------------------------------------------------------------------|---------------|---------------|---------------|--------------------------------------------------------------------------------------------------------|
| 9             | 6-OH-BDE-47  | 4             | 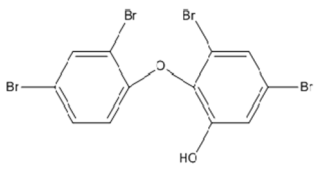<br>6-OH-BDE-47   | 22            | 6-OH-BDE-182  | 7             | <br>6-OH-BDE-182    |
| 10            | 2'-OH-BDE-68 | 4             | <br>2'-OH-BDE-68  | 23            | 4'-OH-BDE-201 | 8             | <br>4'-OH-BDE-201   |
| 11            | 3-OH-BDE-100 | 5             | <br>3-OH-BDE-100 | 24            | 1'-OH-BDE-222 | 9             | <br>1'-OH-BDE-222  |
| 12            | 6-OH-BDE-82  | 5             | <br>6-OH-BDE-82 | 25            | 2'-OH-BDE-201 | 9             | <br>2'-OH-BDE-201 |

| Serial number | Compounds   | Numbers of Br | Formula                                                                                          | Serial number | Compounds     | Numbers of Br | Formula                                                                                              |
|---------------|-------------|---------------|--------------------------------------------------------------------------------------------------|---------------|---------------|---------------|------------------------------------------------------------------------------------------------------|
| 13            | 4-OH-BDE-90 | 5             | 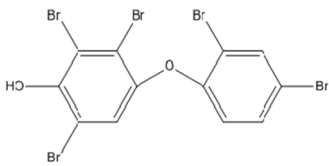<br>4-OH-BDE-90 | 26            | 3'-OH-BDE-201 | 9             | <br>3'-OH-BDE-201 |
